# Supplementary material for: Population Genetic Structure of a Centipede Species with High Levels of Developmental Instability
Source: PLoS One. 2015 Jun 1;10(6):e0126245. doi: 10.1371/journal.pone.0126245 (PMC4452494; doi:10.1371/journal.pone.0126245)
Supplement: S1 Dataset — (XLS) [file pone.0126245.s001.xls]

## Sheet: dataset
specimen code	Population	LBS or	LBS tr	sex	TA	AA	TAS	microsatellites
								H.sub16	H.sub45	H.sub48	H.sub56	H.sub61
S1 Jarret	Jarret	75	77	1	0	0	0
S2 Jarret	Jarret	77	79	1	0	0	0
S3 Jarret	Jarret	79	79	2	0	0	0
S4 Jarret	Jarret	79	79	2	0	1	0
S5 Jarret	Jarret	73	75	1	0	0	0
S6 Jarret	Jarret	77	77	2	0	0	0
S7 Jarret	Jarret	79	81	1	0	0	0
S8 Jarret	Jarret	77	77	2	0	1	0
S9 Jarret	Jarret	77	79	1	0	0	0
S10 Jarret	Jarret	77	79	1	0	0	0
S11 Jarret	Jarret	81	83	1	1	0	3
S1gm Jarret	Jarret	77	79	1	0	1	0	289295	244250	196198	256258	173173
S2gm Jarret	Jarret	75	77	1	0	1	0	289295	244250	194198	256256	173173
S3gm Jarret	Jarret	79	79	2	0	0	0	289295	244250	194194	256256	173173
D1 Seilhac	Seilhac	81	81	2	1	1	1
D2 Seilhac	Seilhac	79	79	2	0	0	0
D3 Seilhac	Seilhac	77	79	1	0	0	0
D4 Seilhac	Seilhac	81	81	2	0	1	0
D5 Seilhac	Seilhac	81	81	2	0	0	0
D6 Seilhac	Seilhac	79	81	1	0	0	0
D7 Seilhac	Seilhac	81	81	2	0	0	0
D8 Seilhac	Seilhac				0	0	0
D9 Seilhac	Seilhac	81	81	2	0	0	0
D10 Seilhac	Seilhac	81	81	2	1	1	2
D11 Seilhac	Seilhac	79	79	2	0	0	0
D12 Seilhac	Seilhac	79	81	1	0	0	0
D13 Seilhac	Seilhac	81	83	1	0	1	0
D14 Seilhac	Seilhac	83	83	2	1	1	2
D15 Seilhac	Seilhac	81	81	2	0	1	0
D1gm Seilhac	Seilhac	81	81	2	0	0	0	292292	242242	200200	256256	185185
D2gm Seilhac	Seilhac	83	83	2	0	0	0	292292	242246	198218	256256	185185
D3gm Seilhac	Seilhac	81	81	2	0	0	0	292292	242246	200200	256256	185185
D4gm Seilhac	Seilhac	81	81	2	1	1	2	292292	242242	198200	256256	185185
D5gm Seilhac	Seilhac	81	83	1	0	0	0	292292	242246	200214	256256	185185
D6gm Seilhac	Seilhac	75	77	1	1	1	3	292292	246246	198198	256256	185185
D7gm Seilhac	Seilhac	75	77	1	0	1	0	292292	242246	198200	256256	185185
D8gm Seilhac	Seilhac	81	81	2	0	0	0	292292	242242	198198	256256	185185
D9gm Seilhac	Seilhac	77	79	1	0	0	0	292292	246246	198214	256256	185185
D10gm Seilhac	Seilhac	79	81	1	0	0	0	292292	242246	198214	256256	185185
D11gm Seilhac	Seilhac	79	81	1	0	1	0	292310	242242	200214	256256	171185
D12gm Seilhac	Seilhac	83	83	2	0	0	0	292292	242246	200214	256256	185185
D13gm Seilhac	Seilhac	83	83	2	0	0	0	292292	242246	198198	256256	185185
D14gm Seilhac	Seilhac	79	81	1	0	0	0	292292	242242	198214	256256	185185
D15gm Seilhac	Seilhac	79	81	1	1	0	2	292292	242242	198198	256256	171185
D16gm Seilhac	Seilhac	77	79	1	0	1	0	292292	242242	200216	256256	185185
D17gm Seilhac	Seilhac	79	79	2	0	0	0	292292	242242	200200	256256	185185
D18gm Seilhac	Seilhac	79	81	1	0	1	0	292292	246246	198198	256256	185185
D19gm Seilhac	Seilhac	79	81	1	0	0	0	292292	242242	198200	256256	185185
D20gm Seilhac	Seilhac	81	81	2	0	0	0	292292	242246	200200	256256	185185
B1 Quimper	Quimper	81	83	1	1	0	1
B2 Quimper	Quimper	83	83	2	0	0	0
B3 Quimper	Quimper	79	79	2	0	0	0
B4 Quimper	Quimper	83	85	1	0	1	0
B5 Quimper	Quimper	79	79	2	1	0	2
B6 Quimper	Quimper	79	81	1	0	0	0
B7 Quimper	Quimper	79	81	1	0	0	0
B8 Quimper	Quimper	79	81	1	1	1	3
B9 Quimper	Quimper	79	81	1	1	0	2
B10 Quimper	Quimper	81	81	2	1	1	1
B11 Quimper	Quimper	79	81	1	1	0	1
B12 Quimper	Quimper	81			0	0	0
B1gm Quimper	Quimper	79	81	1	0	0	0	292292	242244	208214	254256	171171
B2gm Quimper	Quimper	83	85	1	0	0	0	292292	242242	214242	252256	185185
B3gm Quimper	Quimper	79	81	1	0	1	0	289292	242244	200214	252254	171185
B4gm Quimper	Quimper	83	83	2	0	0	0	292292	242242	194214	252256	171185
B5gm Quimper	Quimper	81	81	2	1	1	2	292295	242244	214214	252256	185185
B6gm Quimper	Quimper	81	83	1	0	0	0	292292	242248	196200	256256	185185
B7gm Quimper	Quimper	79	81	1	0	1	0	292295	242242	194214	256256	171185
B8gm Quimper	Quimper	81			0	0	0	292292	244246	242242	256256	185185
B9gm Quimper	Quimper	79	79	2	0	0	0	280289	242242	194242	252256	185185
B10gm Quimper	Quimper	81	81	2	1	0	2	280292	242244	194200	252254	171185
B11gm Quimper	Quimper	79	81	1	0	0	0	292292	244252	214214	256256	171171
B12gm Quimper	Quimper	79	81	1	0	0	0	289292	242244	200214	254254	171171
B13gm Quimper	Quimper			1	0	0	0
B14gm Quimper	Quimper	79	81	1	0	0	0	292292	242242	200214	252256	171171
B15gm Quimper	Quimper	81	83	1	0	0	0	289292	242248	186214	256256	171185
B16gm Quimper	Quimper	81	83	1	0	0	0	292292	242242	200214	256256	171185
B17gm Quimper	Quimper	81	83	1	0	0	0	280292	242242	196200	254254	171171
B18gm Quimper	Quimper	81	81	2	0	1	0	292292	242242	208242	254254	171171
B19gm Quimper	Quimper	79	81	1	0	0	0	289292	242244	214242	252254	185185
B20gm Quimper	Quimper	79	81	1	0	1	0	00	242242	214214	00	171171
J1 Pordic	Pordic	83	83	2	1	1	1
J2 Pordic	Pordic	81	83	1	1	1	3
J3 Pordic	Pordic	83	83	2	0	0	0
J4 Pordic	Pordic	79	81	1	0	1	0
J5 Pordic	Pordic	79	81	1	0	0	0
J6 Pordic	Pordic	81	83	1	0	0	0
J7 Pordic	Pordic	79	81	1	0	0	0
J8 Pordic	Pordic	81	81	2	1	1	2
J9 Pordic	Pordic	83	83	2	0	1	0
J10 Pordic	Pordic	79	81	1	1	0	1
J11 Pordic	Pordic	79	81	1	0	0	0
J12 Pordic	Pordic	79	79	2	1	1	1
J13 Pordic	Pordic	81	81	2	0	0	0
J14 Pordic	Pordic	79	81	1	0	1	0
J15 Pordic	Pordic	77	79	1	0	0	0
J16 Pordic	Pordic	79	81	1	0	0	0
J17 Pordic	Pordic	83	83	2	0	0	0
J18 Pordic	Pordic	85	85	2	0	1	0
J19 Pordic	Pordic	81	83	1	1	1	3
J20 Pordic	Pordic	81	81	2	0	0	0
J21 Pordic	Pordic	81	81	2	1	1	3
J22 Pordic	Pordic	79	81	1	0	0	0
J23 Pordic	Pordic	83	83	2	1	0	2
J24 Pordic	Pordic	83	83	2	1	0	1
J25 Pordic	Pordic			1	0	0	0
J26 Pordic	Pordic	77	79	1	0	0	0
J27 Pordic	Pordic	83	83	2	0	0	0
J28 Pordic	Pordic	81	81	2	0	0	0
J29 Pordic	Pordic	81	81	2	0	0	0
J30 Pordic	Pordic	85	85	2	0	0	0
J31 Pordic	Pordic	81	81	2	0	0	0
J32 Pordic	Pordic	83	83	2	0	0	0
J33 Pordic	Pordic	81	81	2	0	0	0
J34 Pordic	Pordic	81	83	1	0	0	0
J35 Pordic	Pordic	79	79	2	0	1	0
J36 Pordic	Pordic	81	83	1	0	0	0
J37 Pordic	Pordic	83	83	2	0	1	0
J38 Pordic	Pordic	83	83	2	0	0	0
J39 Pordic	Pordic	83	83	2	0	0	0
J40 Pordic	Pordic	77			0	0	0
J41 Pordic	Pordic	83			0	0	0
J42 Pordic	Pordic	81			0	0	0
J43 Pordic	Pordic	79	81	1	0	0	0
J44 Pordic	Pordic	79	81	1	0	0	0
J45 Pordic	Pordic				0	0	0
J1gm Pordic	Pordic	81	83	1	0	0	0	289289	244244	196198	256256	171171
J2gm Pordic	Pordic	79	81	1	0	0	0	289292	242252	196198	256256	171171
J3gm Pordic	Pordic	83	83	2	0	0	0	283289	242244	204204	256256	171171
J4gm Pordic	Pordic	79	81	1	0	0	0	289292	244246	186186	256256	171171
J5gm Pordic	Pordic	79	79	2	0	1	0	289289	242244	204204	256256	171171
J6gm Pordic	Pordic	83	83	2	1	1	1	289292	250252	198204	256256	171171
J7gm Pordic	Pordic	79	81	1	1	1	2	289289	244244	196204	256256	171171
J8gm Pordic	Pordic	81	83	1	0	0	0	289289	242252	196200	256256	171185
J9gm Pordic	Pordic	83	83	2	0	0	0	289289	244252	196200	254256	171171
J10gm Pordic	Pordic	85	85	2	1	0	3	289289	242246	196198	256256	171171
J11gm Pordic	Pordic	81	83	1	0	0	0	289292	242244	186186	256256	171185
J12gm Pordic	Pordic	79	81	1	0	0	0	289289	244244	198198	256256	171171
J13gm Pordic	Pordic	81	81	2	0	0	0	289289	244244	186204	256256	171171
J14gm Pordic	Pordic	83	83	2	0	0	0	289292	244244	186198	256256	171171
J15gm Pordic	Pordic	83	83	2	0	0	0	289289	244244	204204	256256	171185
J16gm Pordic	Pordic	81	83	1	1	0	3	289289	244244	198200	256256	171171
J17gm Pordic	Pordic	81	81	2	1	1	3	289289	244252	196198	256256	171185
J18gm Pordic	Pordic	83	83	2	0	0	0	289289	242252	196198	254256	171171
J19gm Pordic	Pordic	81	83	1	1	0	1
J20gm Pordic	Pordic	77	79	1	0	0	0	289289	244244	200204	256256	171171
I1 Diksmuide	Diksmuide	81	83	1	1	0	3
I2 Diksmuide	Diksmuide	81	83	1	0	0	0
I3 Diksmuide	Diksmuide	83	83	2	0	0	0
I4 Diksmuide	Diksmuide	81	83	1	0	0	0
I5 Diksmuide	Diksmuide	83	83	2	0	0	0
I6 Diksmuide	Diksmuide	83	83	2	0	0	0
I7 Diksmuide	Diksmuide	81	83	1	0	0	0
I8 Diksmuide	Diksmuide	79	81	1	0	0	0
I1gm Diksmuide	Diksmuide	81	83	1	1	0	1	289289	246246	204204	254254	171171
I2gm Diksmuide	Diksmuide	85	85	2	1	1	2	283289	246252	204204	252258	171173
I3gm Diksmuide	Diksmuide	81	83	1	0	0	0	289289	246252	204204	252258	171171
I4gm Diksmuide	Diksmuide	83	83	2	1	1	2	283289	246246	196204	252252	171171
I5gm Diksmuide	Diksmuide	81	83	1	0	0	0	289289	246246	190204	252254	171171
I6gm Diksmuide	Diksmuide	81	83	1	0	0	0	283292	242246	188196	252254	171171
I7gm Diksmuide	Diksmuide	81	83	1	0	1	0	289292	246246	190204	254258	171171
I8gm Diksmuide	Diksmuide	81	81	2	0	0	0	283289	246246	204204	254254	171171
I9gm Diksmuide	Diksmuide	83	83	2	1	0	3	289292	246252	188204	254254	171173
I10gm Diksmuide	Diksmuide	81	83	1	0	0	0	289292	246252	188188	252254	171171
I11gm Diksmuide	Diksmuide	83	83	2	0	0	0	283283	240246	188204	254254	171171
I12gm Diksmuide	Diksmuide	83	83	2	0	0	0	292292	240242	188204	254258	171171
I13gm Diksmuide	Diksmuide	79	81	1	0	0	0	289289	246252	188204	254258	173173
I14gm Diksmuide	Diksmuide	81	83	1	0	0	0	289292	246252	188204	252254	171171
I15gm Diksmuide	Diksmuide	81	81	2	0	0	0	289289	246246	204204	254258	171171
I16gm Diksmuide	Diksmuide	81	83	1	0	0	0	289289	246246	204204	252254	171173
I17gm Diksmuide	Diksmuide	81			0	0	0	289289	246246	188204	252252	171173
I18gm Diksmuide	Diksmuide	83	83	2	0	0	0	289292	246252	190204	254254	171171
I19gm Diksmuide	Diksmuide	81	83	1	0	0	0	289289	246252	204204	252254	171173
I20gm Diksmuide	Diksmuide	81			0	0	0	289292	240246	188204	254254	171171
N1 Hilversum	Hilversum	79	81	1	1	0	1
N2 Hilversum	Hilversum	77	79	1	0	0	0
N3 Hilversum	Hilversum	79	81	1	1	1	1
N4 Hilversum	Hilversum	79	81	1	0	0	0
N5 Hilversum	Hilversum	79	81	1	0	0	0
N6 Hilversum	Hilversum	79	81	1	0	1	0
N7 Hilversum	Hilversum	81	83	1	0	0	0
N8 Hilversum	Hilversum	79	79	2	0	0	0
N9 Hilversum	Hilversum	81	81	2	0	0	0
N10 Hilversum	Hilversum	79	81	1	0	1	0
N11 Hilversum	Hilversum	81	81	2	0	0	0
N12 Hilversum	Hilversum	81	81	2	0	0	0
N13 Hilversum	Hilversum	81	81	2	0	1	0
N14 Hilversum	Hilversum	83	83	2	0	0	0
N15 Hilversum	Hilversum	81	83	1	0	0	0
N16 Hilversum	Hilversum	79	81	1	0	0	0
N17 Hilversum	Hilversum	79	81	1	0	0	0
N18 Hilversum	Hilversum	77	79	1	1	1	2
N19 Hilversum	Hilversum	79	81	1	0	0	0
N20 Hilversum	Hilversum	79	79	2	0	1	0
N21 Hilversum	Hilversum	79	81	1	1	0	2
N22 Hilversum	Hilversum	81	83	1	0	0	0
N23 Hilversum	Hilversum	79	81	1	0	0	0
N24 Hilversum	Hilversum	79	81	1	0	0	0
N25 Hilversum	Hilversum	81	83	1	0	0	0
N26 Hilversum	Hilversum	81	81	2	0	0	0
N27 Hilversum	Hilversum	85	85	2	0	0	0
N28 Hilversum	Hilversum	79	81	1	0	1	0
N29 Hilversum	Hilversum	79	81	1	0	0	0
N30 Hilversum	Hilversum	81	81	2	0	0	0
N31 Hilversum	Hilversum	83	83	2	0	0	0
N32 Hilversum	Hilversum	79	81	1	0	0	0
N33 Hilversum	Hilversum	79	81	1	0	0	0
N34 Hilversum	Hilversum	81	81	2	1	1	3
N35 Hilversum	Hilversum	81	81	2	0	0	0
N36 Hilversum	Hilversum	83	83	2	0	0	0
N37 Hilversum	Hilversum	83	83	2	0	1	0
N38 Hilversum	Hilversum	79	81	1	0	0	0
N39 Hilversum	Hilversum	79	81	1	0	0	0
N40 Hilversum	Hilversum	79	81	1	0	1	0
N41 Hilversum	Hilversum	79	79	2	0	1	0
N42 Hilversum	Hilversum	77	79	1	0	0	0
N43 Hilversum	Hilversum	83	83	2	0	0	0
N44 Hilversum	Hilversum	81	81	2	0	0	0
N45 Hilversum	Hilversum	81	81	2	0	0	0
N46 Hilversum	Hilversum	83	83	2	0	0	0
N47 Hilversum	Hilversum	77	79	1	0	0	0
N1gm Hilversm	Hilversum	81	83	1	0	1	0	289289	246250	188204	252254	171173
N2gm Hilversum	Hilversum	79	81	1	0	1	0	289289	246246	204204	252254	171171
N3gm Hilversum	Hilversum	79	81	1	0	0	0	289289	246250	186186	254254	171171
N4gm Hilversum	Hilversum	81	83	1	0	1	0	289289	246246	188190	254254	171173
N5gm Hilversum	Hilversum	81	81	2	0	0	0	289289	246250	204204	254254	171171
N6gm Hilversum	Hilversum	79	81	1	0	1	0	289289	240246	188204	254254	171171
N7gm Hilversum	Hilversum	77	79	1	0	0	0	283289	240246	188204	252254	171171
N8gm Hilversum	Hilversum	77	79	1	0	0	0	289289	240246	190204	254254	173173
N9gm Hilversum	Hilversum	81	81	2	0	0	0	289289	240246	186204	254254	00
N10gm Hilversum	Hilversum	77	79	1	0	1	0	289289	246250	204204	254254	171173
N11gm Hilversum	Hilversum	79	81	1	0	0	0	289289	246250	204204	254254	171171
N12gm Hilversum	Hilversum	81	81	2	0	0	0	289289	240246	204204	254254	00
N13gm Hilversum	Hilversum	79	81	1	0	0	0	00	00	188204	254254	171171
N14gm Hilversum	Hilversum	79	81	1	0	0	0	289289	246246	188204	254254	171171
N15gm Hilversum	Hilversum	85	85	2	1	0	1	289289	240246	204204	254254	171171
N16gm Hilversum	Hilversum	77	79	1	0	0	0	289289	246250	188204	254254	173173
N17gm Hilversum	Hilversum	79	81	1	0	0	0	289289	246246	204204	254254	171173
N18gm Hilversum	Hilversum	81	83	1	0	0	0	289289	246246	204204	254254	171171
N19gm Hilversum	Hilversum	79	81	1	0	1	0	289289	246250	188204	254254	171171
N20gm Hilversum	Hilversum	83	83	2	1	1	1	289289	246246	190190	254254	171171
N21g Hilversum	Hilversum	79	81	1	0	0	0	289289	246246	188188	252254	171171
N22g Hilversum	Hilversum	83	83	2	0	0	0	289289	240246	190190	254254	171171
H1 Koblenz	Koblenz	81	81	2	0	0	0
H2 Koblenz	Koblenz	79	81	1	1	1	1
H3 Koblenz	Koblenz	81	81	2	0	1	0
H4 Koblenz	Koblenz	81	81	2	0	0	0
H5 Koblenz	Koblenz	77	79	1	1	1	3
H6 Koblenz	Koblenz	83	83	2	0	1	0
H7 Koblenz	Koblenz	83	83	2	0	1	0
H8 Koblenz	Koblenz	81	81	2	1	0	1
H9 Koblenz	Koblenz	79	81	1	1	1	1
H10 Koblenz	Koblenz	81	81	2	0	0	0
H11 Koblenz	Koblenz	81	81	2	0	1	0
H12 Koblenz	Koblenz	79	81	1	1	0	1
H13 Koblenz	Koblenz	79	81	1	1	0	3
H14 Koblenz	Koblenz	81	83	1	0	0	0
H15 Koblenz	Koblenz	79	81	1	0	0	0
H16 Koblenz	Koblenz	79	81	1	0	1	0
H17 Koblenz	Koblenz	81	83	1	0	1	0
H18 Koblenz	Koblenz	79	81	1	0	0	0
H19 Koblenz	Koblenz	81	81	2	1	0	1
H20 Koblenz	Koblenz	79	81	1	0	0	0
H21 Koblenz	Koblenz			2	0	0	0
H1gm Koblenz	Koblenz	81	81	2	0	0	0	289301	242246	200204	254258	171171
H2gm Koblenz	Koblenz	79	81	1	0	0	0	289292	240242	204218	254258	171173
H3gm Koblenz	Koblenz	81	83	1	0	0	0	289301	242246	188200	254254	171171
H4gm Koblenz	Koblenz	81	83	1	0	0	0	289289	246250	186190	254254	171171
H5gm Koblenz	Koblenz	79	81	1	0	1	0	289292	242242	200200	252254	171171
H6gm Koblenz	Koblenz	77	79	1	0	0	0	289292	242242	200204	254254	171173
H7gm Koblenz	Koblenz	83	85	1	0	0	0	289292	246246	204204	254258	171171
H8gm Koblenz	Koblenz	81	81	2	0	0	0	289301	242250	196200	252254	171171
H9gm Koblenz	Koblenz	77	79	1	1	1	1	289292	246246	204204	252254	171173
H10gm Koblenz	Koblenz	81	81	2	0	0	0	289292	242242	00	00	173173
H11gm Koblenz	Koblenz	81	83	1	0	0	0	289292	246246	188188	252254	171171
H12gm Koblenz	Koblenz	79	81	1	0	1	0	292292	246248	204204	254258	171171
H13gm Koblenz	Koblenz	81	83	1	0	1	0	289289	242246	204204	252254	171171
H14gm Koblenz	Koblenz	79	81	1	1	0	2	292292	242246	200204	00	171171
H15gm Koblenz	Koblenz	77	79	1	0	0	0	289292	242242	200200	254254	171171
H16gm Koblenz	Koblenz	77	79	1	1	0	1	289289	240246	188218	254258	171173
H17gm Koblenz	Koblenz	79	81	1	0	0	0	289292	240242	204204	254258	171171
H18gm Koblenz	Koblenz	79	81	1	0	0	0	289292	246246	188188	254258	171173
H19gm Koblenz	Koblenz	83	83	2	0	1	0	289292	246246	204204	254254	171171
H20gm Koblenz	Koblenz	77	79	1	0	1	0	289292	244248	188196	254254	171173
A1 Leipzig	Leipzig	81	81	2	0	1	0
A2 Leipzig	Leipzig	81	81	2	0	0	0
A3 Leipzig	Leipzig	77	79	1	0	0	0
A4 Leipzig	Leipzig	83	83	2	0	1	0
A5 Leipzig	Leipzig	77	79	1	0	1	0
A6 Leipzig	Leipzig	81			0	0	0
A7 Leipzig	Leipzig	79	81	1	0	0	0
A8 Leipzig	Leipzig	79	81	1	0	0	0
A9 Leipzig	Leipzig	77	79	1	0	0	0
A10 Leipzig	Leipzig	79	79	2	0	0	0
A11 Leipzig	Leipzig	81	81	2	0	0	0
A12 Leipzig	Leipzig	79	81	1	0	1	0
A13 Leipzig	Leipzig	81	81	2	0	0	0
A14 Leipzig	Leipzig	77	79	1	0	0	0
A15 Leipzig	Leipzig	81	83	1	0	1	0
A16 Leipzig	Leipzig	81	81	2	0	1	0
A17 Leipzig	Leipzig	81	81	2	0	0	0
A18 Leipzig	Leipzig	81	81	2	0	0	0
A19 Leipzig	Leipzig	77	79	1	0	0	0
A20 Leipzig	Leipzig	81	81	2	0	0	0
A21 Leipzig	Leipzig	81	81	2	0	0	0
A22 Leipzig	Leipzig	81	81	2	0	1	0
A1gm Leipzig	Leipzig	79	81	1	0	0	0	292292	240250	204204	254258	171171
A2gm Leipzig	Leipzig	79	81	1	0	0	0	292292	246250	204204	254258	171171
A3gm Leipzig	Leipzig	77	79	1	0	0	0	289292	246250	186204	254254	171173
A4gm Leipzig	Leipzig	83	83	2	0	0	0	289292	244250	204204	254258	171171
A5gm Leipzig	Leipzig	79	81	1	0	0	0	289289	240242	188204	258258	171171
A6gm Leipzig	Leipzig	81	81	2	0	0	0	286289	240250	204204	254254	171173
A7gm Leipzig	Leipzig	81	81	2	1	0	1	283289	250250	196204	254254	171171
A8gm Leipzig	Leipzig	81	83	1	1	0	2
A9gm Leipzig	Leipzig	83	83	2	1	0	3
A10gm Leipzig	Leipzig	79	81	1	0	1	0
A11gm Leipzig	Leipzig	79	81	1	0	0	0	00	240246	188204	254254	171171
A12gm Leipzig	Leipzig	81	81	2	0	0	0	286289	246250	204204	254254	171173
A13gm Leipzig	Leipzig	81	81	2	0	0	0	289289	242250	190204	254254	171173
A14gm Leipzig	Leipzig	81	83	1	1	1	3	289292	246250	204204	254258	171171
A15gm Leipzig	Leipzig	81	83	1	0	1	0	292292	246250	204204	254258	171173
A16gm Leipzig	Leipzig	79	81	1	0	0	0	289292	246250	204204	254258	171173
A17gm Leipzig	Leipzig	79	81	1	0	0	0	292292	242252	190190	254254	171173
A18gm Leipzig	Leipzig	79	81	1	0	0	0	289292	250250	204204	254254	171171
A19gm Leipzig	Leipzig	77	79	1	0	0	0	283289	242250	00	00	171171
A20gm Leipzig	Leipzig	81	81	2	1	0	1	289292	242244	196204	254254	171173
1 HAL	Halle	81	83	1	1	1	1
2 HAL	Halle	77	79	1	0	1	0
3 HAL	Halle	83	83	2	0	0	0
4 HAL	Halle	79	81	1	0	1	0
5 HAL	Halle	77	79	1	0	0	0
6 HAL	Halle	81	81	2	0	1	0
7 HAL	Halle	79	81	1	0	0	0
8 HAL	Halle	77	79	1	0	1	0
9 HAL	Halle	79	81	1	0	0	0
10 HAL	Halle	79	81	1	0	1	0
11 HAL	Halle	75	77	1	0	0	0
12 HAL	Halle	81	83	1	0	1	0
13 HAL	Halle	79	81	1	0	0	0
14 HAL	Halle	77	79	1	0	0	0
15 HAL	Halle	79	81	1	0	0	0
16 HAL	Halle	81	81	2	0	0	0
17 HAL	Halle	81	81	2	0	1	0
18 HAL	Halle	77	79	1	0	1	0
19 HAL	Halle	79	81	1	0	0	0
20 HAL	Halle	79	81	1	0	0	0
21 HAL	Halle	83	83	2	0	0	0
22 HAL	Halle	81	81	2	1	0	1
23 HAL	Halle	79	81	1	0	0	0
24 HAL	Halle			1	0	0	0
25 HAL	Halle	81	81	2	0	0	0
M1 Halle	Halle	77	79	1	0	0	0
M2 Halle	Halle	81	81	2	0	0	0
M3 Halle	Halle	83	83	2	0	0	0
M4 Halle	Halle	81	83	1	0	0	0
M5 Halle	Halle	81	81	2	0	1	0
M6 Halle	Halle	83	83	2	0	0	0
M7 Halle	Halle	79	81	1	1	1	3
M8 Halle	Halle	79	81	1	0	0	0
M9 Halle	Halle	81	81	2	0	0	0
M10 Halle	Halle	79	81	1	0	0	0
M11 Halle	Halle	79	81	1	0	0	0
M12 Halle	Halle	79	81	1	0	1	0
M13 Halle	Halle				0	0	0
M14 Halle	Halle				0	0	0
M1gm Halle	Halle	83	83	2	0	1	0	289289	250250	196200	254254	171171
M2gm Halle	Halle	79	79	2	0	0	0	289289	250250	204204	258258	171171
M3gm Halle	Halle	83	83	2	0	0	0	289289	250254	190190	254254	171171
M4gm Halle	Halle	81	81	2	1	1	1	289289	242246	00	00	171171
M5gm Halle	Halle	79	81	1	0	0	0	289292	240242	190190	254258	171185
M6gm Halle	Halle	79	79	2	0	0	0	283289	246252	204204	254258	171173
M7gm Halle	Halle	81	81	2	0	0	0	289289	240242	190204	254254	171171
M8gm Halle	Halle	81	81	2	0	0	0	283283	246250	186204	254258	171171
M9gm Halle	Halle	81	81	2	0	0	0	289289	242246	196204	254254	171173
M10gm Halle	Halle	79	81	1	0	1	0	289289	246250	200204	254254	171171
M11gm Halle	Halle	79	81	1	0	0	0	289289	246250	00	254254	171173
M12gm Halle	Halle	79	81	1	0	0	0	289289	246250	204204	254254	171185
M13gm Halle	Halle	79	81	1	0	1	0	283292	240242	200204	254254	171171
M14gm Halle	Halle	81	81	2	0	0	0	283289	250254	190190	254254	171171
M15gm Halle	Halle	79	81	1	0	0	0	283289	246246	196204	254258	171173
M16gm Halle	Halle	79	81	1	0	1	0	283289	242250	190196	254254	171173
M17gm Halle	Halle	81	83	1	1	1	3	289292	242246	196204	254258	171171
M18gm Halle	Halle	81	81	2	0	1	0	283289	246250	190196	254254	171171
M19gm Halle	Halle	79	81	1	0	1	0	283283	240242	188190	254254	171171
M20gm Halle	Halle	79	81	1	0	0	0	289289	242250	188204	254254	171171
O1 Bautzen	Bautzen	81	81	2	0	1	0
O2 Bautzen	Bautzen	79	81	1	1	1	1
O3 Bautzen	Bautzen	87	87	2	0	0	0
O4 Bautzen	Bautzen	79	81	1	0	0	0
O1gm Bautzen	Bautzen	81	83	1	1	0	3	289289	242246	204204	252254	171171
O2gm Bautzen	Bautzen	79	81	1	0	1	0	283289	242242	190200	254254	171171
O3gm Bautzen	Bautzen	79	81	1	0	0	0	283292	250250	186196	254254	171171
O4gm Bautzen	Bautzen	81	81	2	0	0	0	289289	246250	188204	254258	171171
O5gm Bautzen	Bautzen	79	81	1	0	0	0	289292	242250	204204	254254	171173
O6gm Bautzen	Bautzen	81	81	2	0	0	0	289289	250252	188204	252254	171173
O7gm Bautzen	Bautzen	81	81	2	0	0	0	289292	246250	196204	254254	173173
O8gm Bautzen	Bautzen	81	83	1	0	0	0	283289	246250	186196	252258	171171
O9gm Bautzen	Bautzen	81	81	2	1	0	3	283301	246246	196204	252258	171171
O10gm Bautzen	Bautzen	81	81	2	0	0	0	289292	246250	186204	254258	171173
O11gm Bautzen	Bautzen	81	81	2	0	0	0	289289	246250	196204	254254	171173
O12gm Bautzen	Bautzen	81	83	1	0	1	0	283289	242246	186204	254258	171173
O13gm Bautzen	Bautzen	81	83	1	0	0	0	283289	246246	190204	254254	173173
O14gm Bautzen	Bautzen	81	81	2	0	0	0	289289	246250	186204	254258	00
O15gm Bautzen	Bautzen	79	81	1	0	0	0	289301	246246	188204	254258	171171
O16gm Bautzen	Bautzen	81	83	1	0	0	0	283289	246250	186204	252254	171171
O17gm Bautzen	Bautzen	79	81	1	0	1	0	283283	246250	204204	254258	171173
O18gm Bautzen	Bautzen	79	81	1	0	0	0	289289	244250	190196	254254	171171
O19gm Bautzen	Bautzen	79	81	1	0	0	0	00	00	196204	254254	171173
O20gm Bautzen	Bautzen	81	83	1	0	1	0	283289	242250	190204	254254	171171
1 BAUT	Bautzen	81	81	2	0	0	0
2 BAUT	Bautzen	77	79	1	0	0	0
3 BAUT	Bautzen	77	79	1	0	0	0
4 BAUT	Bautzen	77	79	1	0	0	0
5 BAUT	Bautzen	81	81	2	0	0	0
6 BAUT	Bautzen	79	81	1	0	0	0
7 BAUT	Bautzen	81	83	1	0	0	0
8 BAUT	Bautzen	79	81	1	0	0	0
9 BAUT	Bautzen	77	79	1	0	0	0
10 BAUT	Bautzen	77	79	1	0	0	0
11 BAUT	Bautzen	81	81	2	0	0	0
810	Poznań	83	83	2	0	0	0
811	Poznań	81	81	2	0	0	0
812	Poznań	81	83	1	0	0	0
813	Poznań	79	81	1	0	0	0
814	Poznań	81	81	2	0	0	0
815	Poznań	81	81	2	0	0	0
816	Poznań	81	81	2	1	1	3
817	Poznań	79	79	2	0	0	0
818	Poznań	83	83	2	1	1	2
819	Poznań	81	81	2	0	1	0
820	Poznań	77	79	1	0	0	0
821	Poznań	81	83	1	0	0	0
822	Poznań	81	81	2	0	0	0
823	Poznań	79	81	1	0	0	0
824	Poznań	77	79	1	0	0	0
825	Poznań	77	79	1	0	0	0
826	Poznań	79	79	2	0	0	0
827	Poznań	81	83	1	0	0	0
828	Poznań	81	83	1	0	0	0
829	Poznań	79	81	1	0	1	0
830	Poznań	77	79	1	0	1	0
831	Poznań	81	83	1	0	0	0
832	Poznań	79	81	1	0	0	0
833	Poznań	77	79	1	0	0	0
834	Poznań	81	81	2	1	1	2
835	Poznań	83	83	2	0	1	0
836	Poznań	79	81	1	0	0	0
837	Poznań	81	81	2	0	0	0
838	Poznań	83	83	2	0	1	0
839	Poznań	79	79	2	0	1	0
840	Poznań	79	81	1	0	1	0
841	Poznań	79	81	1	0	0	0
842	Poznań	79	81	1	0	1	0
843	Poznań	83	83	2	0	0	0
844	Poznań	79	81	1	0	0	0
845	Poznań	79	81	1	0	1	0
846	Poznań	81	81	2	0	0	0
847	Poznań	79	81	1	0	0	0
848	Poznań	81	83	1	0	1	0
849	Poznań	81	81	2	0	0	0
850	Poznań	79	81	1	1	1	2
851	Poznań	81	83	1	1	0	3
852	Poznań	79	81	1	0	0	0
853	Poznań	81	81	2	0	0	0
854	Poznań	77	79	1	0	0	0
855	Poznań	81	81	2	0	0	0
856	Poznań	79	81	1	0	1	0
857	Poznań	79	81	1	0	0	0
858	Poznań	81	83	1	0	0	0
859	Poznań	83	83	2	0	0	0
860	Poznań	77	79	1	0	0	0
861	Poznań	79	81	1	0	1	0
862	Poznań	81	83	1	1	0	2
863	Poznań	79	79	2	0	1	0
864	Poznań	81	83	1	0	0	0
865	Poznań	81	83	1	0	0	0
866	Poznań	77	79	1	0	0	0
867	Poznań	77	79	1	1	0	2
868	Poznań	79	81	1	0	0	0
869	Poznań	79	81	1	0	0	0
870	Poznań	83	83	2	0	0	0
871	Poznań	79	79	2	0	0	0
872	Poznań	81	83	1	0	0	0
873	Poznań	81	81	2	0	0	0
874	Poznań	79	79	2	0	0	0
875	Poznań	81	81	2	0	1	0
876	Poznań	81	83	1	0	0	0
877	Poznań	81	83	1	0	0	0
878	Poznań	81	83	1	0	0	0
879	Poznań	79	81	1	0	0	0
880	Poznań	79	81	1	0	0	0
881	Poznań	79	81	1	0	0	0
882	Poznań	79	81	1	0	0	0
883	Poznań	81	81	2	0	0	0
884	Poznań	79	81	1	0	0	0
885	Poznań	81	81	2	0	1	0
886	Poznań	79	79	2	0	0	0
887	Poznań	81	81	2	0	0	0
888	Poznań	81	81	2	0	0	0
889	Poznań	83	83	2	0	0	0
890	Poznań	79	81	1	0	0	0
891	Poznań	83	83	2	0	0	0
892	Poznań	81	81	2	0	0	0
893	Poznań	83	83	2	0	1	0
894	Poznań	83	83	2	0	1	0
895	Poznań	81	83	1	1	0	2
896	Poznań	83	83	2	0	0	0
897	Poznań	83	83	2	0	0	0
898	Poznań	81	81	2	0	0	0
899	Poznań	77	79	1	0	0	0
900	Poznań	79	81	1	0	0	0
901	Poznań	79	81	1	0	0	0
902	Poznań	79	81	1	0	0	0
903	Poznań	83	83	2	0	0	0
904	Poznań	79	81	1	0	0	0
905	Poznań	81	83	1	0	0	0
906	Poznań	81	83	1	0	0	0
907	Poznań	79	81	1	0	1	0
908	Poznań	79	79	2	0	0	0
909	Poznań	79	81	1	0	0	0
910	Poznań	79	79	2	0	0	0
911	Poznań	77	79	1	0	0	0
912	Poznań	81	81	2	0	1	0
913	Poznań	83	83	2	0	0	0
914	Poznań	83	83	2	0	0	0
915	Poznań	79	81	1	0	1	0
916	Poznań	81	83	1	0	0	0
917	Poznań	77	79	1	0	0	0
918	Poznań	81	83	1	0	0	0
919	Poznań	77	79	1	0	1	0
920	Poznań	81	83	1	0	0	0
921	Poznań	83	83	2	0	0	0
922	Poznań	83	83	2	0	1	0
923	Poznań	81	81	2	0	0	0
924	Poznań	79	81	1	0	1	0
925	Poznań	77	79	1	0	0	0
926	Poznań	79	81	1	0	0	0
927	Poznań	81	81	2	0	0	0
928	Poznań	81	81	2	0	0	0
929	Poznań	83	83	2	0	0	0
930	Poznań	83	83	2	0	0	0
931	Poznań	79	81	1	0	0	0
932	Poznań	81	81	2	0	0	0
933	Poznań	81	81	2	0	0	0
934	Poznań	81	81	2	0	1	0
935	Poznań	81	81	2	0	0	0
936	Poznań	79	81	1	0	0	0
937	Poznań	79	81	1	0	0	0
938	Poznań	81	81	2	0	0	0
939	Poznań	81	81	2	0	0	0
940	Poznań	77	79	1	0	0	0
941	Poznań	81	81	2	0	0	0
942	Poznań	79	81	1	0	0	0
943	Poznań	81	83	1	0	0	0
944	Poznań	81	83	1	0	0	0
945	Poznań	79	79	2	0	0	0
946	Poznań	83	83	2	0	0	0
947	Poznań	81	81	2	0	0	0
948	Poznań	79	81	1	0	0	0
949	Poznań	81	81	2	0	0	0
950	Poznań	83	83	2	0	0	0
951	Poznań	77	79	1	0	0	0
952	Poznań	83	83	2	0	0	0
953	Poznań	79	79	2	0	1	0
954	Poznań	77	79	1	0	0	0
955	Poznań	81	81	2	0	1	0
956	Poznań	81	81	2	0	0	0
957	Poznań	79	81	1	0	1	0
958	Poznań	77	79	1	0	0	0
959	Poznań	81	81	2	0	0	0
960	Poznań	79	81	1	0	1	0
961	Poznań	81	81	2	0	1	0
962	Poznań	81	81	2	0	0	0
963	Poznań	81	83	1	0	0	0
964	Poznań	83	83	2	0	0	0
965	Poznań	77	79	1	0	1	0
966	Poznań	79	81	1	0	0	0
967	Poznań	79	81	1	0	0	0
968	Poznań	79	81	1	0	1	0
969	Poznań	81	81	2	0	0	0
970	Poznań	77	79	1	0	0	0
971	Poznań	81	81	2	0	0	0
972	Poznań	79	81	1	0	0	0
973	Poznań	81	81	2	0	0	0
974	Poznań	79	81	1	0	1	0
975	Poznań	81	81	2	0	0	0
976	Poznań	79	81	1	1	1	3
977	Poznań	81	81	2	0	0	0
978	Poznań	79	81	1	0	0	0
979	Poznań	81	81	2	0	1	0
980	Poznań	81	81	2	0	0	0
981	Poznań	79	81	1	0	1	0
982	Poznań	79	81	1	0	0	0
983	Poznań	79	81	1	0	0	0
984	Poznań	79	81	1	0	0	0
985	Poznań	81	81	2	0	0	0
986	Poznań	81	81	2	0	0	0
987	Poznań	81	81	2	0	0	0
988	Poznań	79	81	1	0	0	0
989	Poznań	79	81	1	0	1	0
990	Poznań	79	81	1	0	0	0
991	Poznań	81	81	2	0	0	0
992	Poznań	79	81	1	0	0	0
993	Poznań	83	83	2	1	1	3
994	Poznań	79	81	1	0	0	0
995	Poznań	81	81	2	0	1	0
996	Poznań	81	83	1	0	1	0
997	Poznań	77	79	1	0	0	0
998	Poznań	79	79	2	0	0	0
999	Poznań	83	83	2	0	0	0
1000	Poznań	77	79	1	0	0	0
1001	Poznań	81	83	1	0	0	0
1002	Poznań	79	81	1	0	0	0
1003	Poznań	77	79	1	0	0	0
1004	Poznań	81	83	1	0	0	0
1005	Poznań	79	81	1	0	0	0
1006	Poznań	83	83	2	0	1	0
1007	Poznań	83	83	2	0	1	0
1008	Poznań	81	81	2	0	0	0
1009	Poznań	79	81	1	0	0	0
1010	Poznań	81	81	2	0	0	0
1011	Poznań	79	81	1	0	0	0
1012	Poznań	79	81	1	0	1	0
1013	Poznań	81	83	1	0	0	0
1014	Poznań	81	81	2	0	1	0
1015	Poznań	81	81	2	0	1	0
1016	Poznań	81	83	1	0	1	0
1017	Poznań	81	81	2	0	1	0
1018	Poznań	79	81	1	0	1	0
1019	Poznań	79	81	1	0	0	0
1020	Poznań	81	83	1	0	0	0
1021	Poznań	83	83	2	0	0	0
1022	Poznań	83	83	2	0	1	0
1023	Poznań	81	81	2	0	0	0
1024	Poznań	79	81	1	0	0	0
1025	Poznań	79	81	1	1	0	3
1026	Poznań	81	83	1	0	0	0
1027	Poznań	77	79	1	0	0	0
1028	Poznań	79	81	1	0	0	0
1029	Poznań	81	81	2	0	1	0
1030	Poznań	81	83	1	0	0	0
1031	Poznań	83	83	2	0	0	0
1032	Poznań	79	81	1	0	1	0
1033	Poznań	79	81	1	0	1	0
1034	Poznań	81	83	1	0	0	0
1035	Poznań	83	83	2	0	0	0
1036	Poznań	79	81	1	0	1	0
1037	Poznań	81	83	1	0	0	0
1038	Poznań	81	81	2	0	0	0
1039	Poznań	81	81	2	0	0	0
1040	Poznań	81	81	2	0	0	0
1041	Poznań	79	79	2	0	1	0
1042	Poznań	79	79	2	0	1	0
1043	Poznań	79	81	1	0	0	0
1044	Poznań	77	79	1	0	0	0
1045	Poznań	77	79	1	0	0	0
1046	Poznań	81	81	2	0	0	0
1047	Poznań	77	79	1	1	0	3
1048	Poznań	81	81	2	0	1	0
1049	Poznań	79	81	1	0	0	0
1050	Poznań	79	81	1	1	1	3
1051	Poznań	79	81	1	0	1	0
1052	Poznań	81	83	1	0	0	0
1053	Poznań	81	81	2	0	0	0
1054	Poznań	79	81	1	0	1	0
1055	Poznań	83	83	2	0	0	0
1056	Poznań	79	81	1	0	1	0
1057	Poznań	79	81	1	0	0	0
1058	Poznań	83	83	2	1	1	3
1059	Poznań	81	81	2	0	1	0
1060	Poznań	79	81	1	0	0	0
1061	Poznań	81	81	2	0	1	0
1062	Poznań	81	81	2	0	0	0
1063	Poznań	79	81	1	0	0	0
1064	Poznań	81	81	2	0	0	0
1065	Poznań	83	83	2	0	0	0
1066	Poznań	83	83	2	0	0	0
1067	Poznań	79	81	1	0	0	0
1068	Poznań	79	81	1	1	1	3
1069	Poznań	81	81	2	0	0	0
1070	Poznań	83	83	2	0	1	0
1071	Poznań	83	83	2	0	0	0
1072	Poznań	81	81	2	0	1	0
1073	Poznań	81	81	2	1	1	3
1074	Poznań	79	81	1	0	0	0
1075	Poznań	83	83	2	1	1	2
1076	Poznań	79	81	1	0	0	0
1077	Poznań	79	81	1	0	0	0
1078	Poznań	81	83	1	0	0	0
1079	Poznań	81	83	1	0	0	0
1080	Poznań	81	83	1	0	0	0
1081	Poznań	77	79	1	0	0	0
1082	Poznań	81	81	2	1	0	3
1083	Poznań	81	81	2	0	0	0
1084	Poznań	79	81	1	0	0	0
1085	Poznań	81	81	2	0	0	0
1086	Poznań	79	81	1	0	0	0
1087	Poznań	79	81	1	0	0	0
1088	Poznań	81	83	1	0	0	0
1089	Poznań			2	1	0	2
1090	Poznań	79	81	1	0	0	0
1091	Poznań	81	81	2	0	0	0
1092	Poznań	79	81	1	0	1	0
1093	Poznań	81	83	1	0	0	0
1094	Poznań	81	81	2	0	1	0
1095	Poznań	83	83	2	0	0	0
1096	Poznań	83	83	2	1	0	3
1097	Poznań	81	81	2	1	1	3
1098	Poznań	77	79	1	0	0	0
1099	Poznań	79	81	1	1	1	3
1100	Poznań	79	81	1	0	0	0
1101	Poznań	83	83	2	0	0	0
1102	Poznań	79	81	1	0	0	0
1103	Poznań	81	81	2	0	0	0
1104	Poznań	81	81	2	0	0	0
1105	Poznań	81	81	2	0	0	0
1106	Poznań	79	79	2	0	0	0
1107	Poznań	79	81	1	0	1	0
1108	Poznań	83	83	2	0	0	0
1109	Poznań	81	83	1	0	0	0
1110	Poznań	83	83	2	0	1	0
1111	Poznań	79	81	1	0	0	0
1112	Poznań	79	81	1	0	0	0
1113	Poznań	79	81	1	0	0	0
1114	Poznań	81	81	2	0	1	0
1115	Poznań	81	81	2	0	0	0
1116	Poznań	81	81	2	0	0	0
1117	Poznań	79	79	2	1	1	1
1118	Poznań	81	83	1	0	0	0
1119	Poznań	81	81	2	0	0	0
1120	Poznań	83	83	2	0	0	0
1121	Poznań	81	81	2	1	1	1
1122	Poznań	81	81	2	0	0	0
1123	Poznań	81	83	1	0	0	0
1124	Poznań	79	81	1	0	1	0
1125	Poznań	81	81	2	1	1	1
1126	Poznań	77	79	1	0	0	0
1127	Poznań	79	81	1	0	1	0
1128	Poznań	79	81	1	0	1	0
1129	Poznań	83	83	2	1	1	3
1130	Poznań	79	81	1	1	1	3
1131	Poznań	79	81	1	0	0	0
1132	Poznań	79	81	1	0	0	0
1133	Poznań	81	81	2	0	0	0
1134	Poznań	83	83	2	0	0	0
1135	Poznań	81	83	1	0	0	0
1136	Poznań	85	85	2	1	0	1
1137	Poznań	79	81	1	0	0	0
1138	Poznań	81	83	1	0	1	0
1139	Poznań	81	83	1	0	0	0
1140	Poznań	77	79	1	0	0	0
1141	Poznań	81	81	2	0	0	0
1142	Poznań	79	81	1	1	1	3
1143	Poznań	81	83	1	0	1	0
1144	Poznań	81	83	1	0	0	0
1145	Poznań	81	83	1	0	0	0
1146	Poznań	83	83	2	0	0	0
1147	Poznań	81	81	2	0	0	0
1148	Poznań	79	81	1	0	1	0
1149	Poznań	81	83	1	0	0	0
1150	Poznań	81	81	2	0	0	0
1151	Poznań	77	79	1	0	1	0
1152	Poznań	81	81	2	0	0	0
1153	Poznań	79	81	1	0	0	0
1154	Poznań	81	81	2	0	0	0
1155	Poznań	83	83	2	0	0	0
1156	Poznań	81	81	2	0	0	0
1157	Poznań	81	81	2	0	0	0
1158	Poznań	79	81	1	0	0	0
1159	Poznań	79	81	1	0	0	0
1160	Poznań	83	83	2	0	0	0
1161	Poznań	79	81	1	0	1	0
1162	Poznań	79	81	1	0	0	0
1163	Poznań	81	81	2	0	0	0
1164	Poznań	79	81	1	0	1	0
1165	Poznań	79	81	1	0	1	0
1166	Poznań	79	81	1	0	1	0
1167	Poznań	79	81	1	0	0	0
1168	Poznań	77	79	1	0	0	0
1169	Poznań	81	81	2	0	1	0
1170	Poznań	79	81	1	0	1	0
1171	Poznań	77	79	1	0	0	0
1172	Poznań	79	81	1	0	0	0
1173	Poznań	81	81	2	0	0	0
1174	Poznań	81	81	2	0	0	0
1175	Poznań	79	81	1	0	1	0
1176	Poznań	81	81	2	0	0	0
1177	Poznań	83	83	2	0	0	0
1178	Poznań	81	81	2	0	0	0
1179	Poznań	81	81	2	0	0	0
1180	Poznań	79	81	1	0	0	0
1181	Poznań	79	81	1	0	0	0
1182	Poznań	79	81	1	0	1	0
1183	Poznań	81	81	2	0	0	0
1184	Poznań	79	81	1	1	1	2
1185	Poznań	81	81	2	0	1	0
1186	Poznań	79	81	1	0	1	0
1187	Poznań			2	1	0	3
1188	Poznań	83	83	2	0	0	0
1189	Poznań	79	81	1	0	0	0
1190	Poznań	79	81	1	0	1	0
1191	Poznań	79	81	1	0	0	0
1192	Poznań	79	81	1	0	1	0
1193	Poznań			1	1	0	3
1194	Poznań	79	81	1	0	1	0
1195	Poznań	81	81	2	0	0	0
1196	Poznań	79	81	1	0	1	0
1197	Poznań	81	81	2	1	1	2
1198	Poznań	79	81	1	0	1	0
1199	Poznań	77	79	1	0	0	0
1200	Poznań	79	79	2	0	1	0
1201	Poznań	81	83	1	0	1	0
1202	Poznań	79	81	1	1	1	2
1203	Poznań	83	83	2	0	0	0
1204	Poznań	79	81	1	0	0	0
1205	Poznań	79	81	1	0	0	0
1206	Poznań	79	81	1	0	0	0
1207	Poznań	81	81	2	0	1	0
1208	Poznań	79	81	1	0	0	0
1209	Poznań	81	83	1	0	0	0
1210	Poznań	79	81	1	0	1	0
1211	Poznań	79	81	1	0	0	0
1212	Poznań	85	85	2	1	0	2
1213	Poznań	79	81	1	0	0	0
1214	Poznań	79	81	1	0	0	0
1215	Poznań	81			0	0	0
1216	Poznań	83	83	2	0	0	0
1217	Poznań	79	81	1	0	0	0
1218	Poznań	77	79	1	1	0	1
1219	Poznań	83	83	2	0	0	0
1220	Poznań	77	79	1	0	0	0
1221	Poznań	83	83	2	0	1	0
1222	Poznań	79	81	1	0	0	0
1223	Poznań	79	81	1	0	0	0
1224	Poznań	79	81	1	0	0	0
1225	Poznań	79	81	1	0	0	0
1226	Poznań	79	81	1	0	1	0
1227	Poznań	79	81	1	0	0	0
1228	Poznań	83	83	2	0	0	0
1229	Poznań	81	81	2	0	0	0
1230	Poznań	81	81	2	0	1	0
1231	Poznań	83	83	2	0	1	0
1232	Poznań	79	81	1	0	0	0
1233	Poznań	81	83	1	0	0	0
1234	Poznań	83	83	2	1	1	2
1235	Poznań	83	83	2	0	1	0
1236	Poznań	79	81	1	0	0	0
1237	Poznań	81	83	1	0	1	0
1238	Poznań	81	81	2	0	0	0
1239	Poznań	79	79	2	0	1	0
1240	Poznań	81	81	2	0	1	0
1241	Poznań	83	83	2	0	1	0
1242	Poznań	81	81	2	0	0	0
1243	Poznań	83	83	2	0	0	0
1244	Poznań	79	81	1	0	0	0
1245	Poznań	77	79	1	0	1	0
1246	Poznań	79	81	1	0	0	0
1247	Poznań	81	81	2	0	1	0
1248	Poznań	83	83	2	0	0	0
1249	Poznań	79	81	1	0	0	0
1250	Poznań	83	83	2	0	0	0
1251	Poznań	79	81	1	0	0	0
1252	Poznań	79	81	1	0	0	0
1253	Poznań	79	81	1	0	0	0
1254	Poznań	83	83	2	0	0	0
1255	Poznań	81	81	2	0	1	0
1256	Poznań	79	81	1	0	0	0
1257	Poznań	79	81	1	0	1	0
1258	Poznań	79	81	1	0	0	0
1259	Poznań	81	81	2	0	0	0
1260	Poznań	79	81	1	0	1	0
1261	Poznań	83	83	2	0	0	0
1262	Poznań	83	83	2	0	0	0
1263	Poznań	77	79	1	0	0	0
1264	Poznań	81	81	2	0	0	0
1265	Poznań	79	81	1	0	0	0
1266	Poznań	79	81	1	0	0	0
1267	Poznań	77	79	1	0	0	0
1268	Poznań	81	81	2	0	0	0
1269	Poznań	79	81	1	0	0	0
1270	Poznań	79	81	1	0	0	0
1271	Poznań	79	81	1	1	0	1
1272	Poznań	81	81	2	0	1	0
1273	Poznań	79	81	1	0	0	0
1274	Poznań	79	81	1	0	0	0
1275	Poznań	77	79	1	0	0	0
1276	Poznań	81	81	2	0	1	0
1277	Poznań	81	81	2	0	0	0
1278	Poznań	77	79	1	0	0	0
1279	Poznań	79	81	1	0	1	0
1280	Poznań	79	81	1	0	0	0
1281	Poznań	79	81	1	1	1	2
1282	Poznań	79	81	1	0	0	0
1283	Poznań	81	81	2	0	0	0
1284	Poznań	81	83	1	0	0	0
1285	Poznań	83	83	2	0	0	0
1286	Poznań	79	81	1	0	0	0
1287	Poznań	83	83	2	0	0	0
1288	Poznań	79	81	1	0	0	0
1289	Poznań	79	81	1	0	1	0
1290	Poznań	79	81	1	0	0	0
1291	Poznań	79	81	1	0	0	0
1292	Poznań	79	81	1	1	1	3
1293	Poznań	81	81	2	0	0	0
1294	Poznań	79	81	1	0	0	0
1295	Poznań	83	83	2	0	1	0
1296	Poznań	79	81	1	0	1	0
1297	Poznań	81	81	2	0	0	0
1298	Poznań	81	83	1	0	0	0
1299	Poznań	81	81	2	0	1	0
1300	Poznań	83	83	2	0	0	0
1301	Poznań	79	81	1	0	0	0
1302	Poznań	77	79	1	0	1	0
1303	Poznań	83	83	2	0	1	0
1304	Poznań	79	81	1	0	0	0
1305	Poznań	83	83	2	0	1	0
1306	Poznań	81	81	2	0	0	0
1307	Poznań	79	81	1	0	0	0
1308	Poznań	83	83	2	0	0	0
1309	Poznań	81	81	2	0	0	0
1310	Poznań	79	81	1	0	0	0
1311	Poznań	79	81	1	0	0	0
1312	Poznań	83	83	2	0	0	0
1313	Poznań	79	81	1	0	0	0
1314	Poznań	83	83	2	0	1	0
1315	Poznań	79	81	1	0	0	0
1316	Poznań	79	81	1	0	0	0
1317	Poznań	79	81	1	0	1	0
1318	Poznań	81	83	1	1	1	2
1319	Poznań	81	81	2	0	0	0
1320	Poznań	77	79	1	0	0	0
1321	Poznań	79	81	1	0	0	0
1322	Poznań	77	79	1	0	0	0
1323	Poznań	79	81	1	0	1	0
1324	Poznań	81	81	2	0	0	0
1325	Poznań	77	79	1	0	0	0
1326	Poznań	81	83	1	0	0	0
1327	Poznań	79	81	1	0	1	0
1328	Poznań	79	81	1	0	0	0
1329	Poznań	83	83	2	0	1	0
1330	Poznań	81	83	1	1	0	3
1331	Poznań	79	81	1	0	0	0
1332	Poznań	81	83	1	0	0	0
1333	Poznań	81	81	2	0	0	0
1334	Poznań	79	81	1	0	1	0
1335	Poznań	83	83	2	0	1	0
1336	Poznań	83	83	2	0	0	0
1337	Poznań	77	79	1	0	0	0
1338	Poznań	79	81	1	0	0	0
1339	Poznań	81	81		0	0	0
1340	Poznań	79	79	2	0	0	0
1341	Poznań	77	79	1	0	0	0
1342	Poznań	79	81	1	0	0	0
1343	Poznań	83	83	2	0	0	0
1344	Poznań	83	83	2	1	0	3
1345	Poznań			1	1	1	3
1346	Poznań	81	81	2	1	0	3
1346	Poznań	79	81	1	0	0	0
1347	Poznań	79	81	1	0	1	0
1347	Poznań	81	81	2	0	0	0
1348	Poznań	79	81	1	1	1	3
1348	Poznań	83	83	2	0	1	0
1349	Poznań	83	83	2	1	0	3
1349	Poznań	81	81	2	0	0	0
1350	Poznań	81	81	2	0	0	0
1351	Poznań	83	83	2	0	1	0
1352	Poznań	79	81	1	0	0	0
1353	Poznań	81	81	2	0	1	0
1354	Poznań	77	79	1	0	0	0
1355	Poznań	83	83	2	0	0	0
1356	Poznań	83	83	2	0	1	0
1357	Poznań	81	81	2	0	0	0
1358	Poznań	81	83	1	0	0	0
1359	Poznań	81	81	2	0	0	0
1360	Poznań	81	81	2	0	0	0
1361	Poznań	79	81	1	0	0	0
1362	Poznań	83	83	2	0	0	0
1363	Poznań	79	81	1	0	0	0
1364	Poznań	79	81	1	0	0	0
1365	Poznań	77	79	1	0	0	0
1366	Poznań	79	81	1	0	0	0
1367	Poznań	81	81	2	0	0	0
1368	Poznań	81	81	2	0	0	0
1369	Poznań	81	83	1	0	1	0
1370	Poznań	81	81	2	0	1	0
1371	Poznań	81	83	1	0	0	0
1372	Poznań	79	81	1	0	0	0
1373	Poznań	81	81	2	1	0	3
1374	Poznań	83	83	2	0	0	0
1375	Poznań	79	79	2	0	1	0
1376	Poznań	81	81	2	0	0	0
1377	Poznań	81	81	2	0	1	0
1378	Poznań	83	83	2	1	1	1
1379	Poznań	81	81	2	0	0	0
1380	Poznań	79	81	1	0	0	0
1381	Poznań	81	81	2	0	0	0
1382	Poznań	77	79	1	0	0	0
1383	Poznań	77	79	1	0	0	0
1384	Poznań	79	79	2	1	0	3
1385	Poznań	81	81	2	0	0	0
1386	Poznań	77	79	1	0	0	0
1387	Poznań	81	83	1	0	0	0
1388	Poznań	81	81	2	0	0	0
1389	Poznań	81	83	1	0	0	0
1390	Poznań	79	81	1	0	0	0
1391	Poznań			2	0	0	0
1392	Poznań	79	81	1	0	0	0
1393	Poznań	81	81	2	0	0	0
1394	Poznań	79	81	1	0	0	0
1395	Poznań	79	81	1	0	0	0
1396	Poznań	87	89	1	1	0	3
1397	Poznań	79	81	1	1	1	3
1398	Poznań	79	79	2	1	1	3
1399	Poznań	83	83	2	1	1	3
1400	Poznań	81	81	2	1	1	3
1401	Poznań	79	81	1	1	1	3
1402	Poznań	83	83	2	0	1	0
1403	Poznań	83	83	2	1	1	3
SS1	Poznań							289292	246246	190204	254258	171171
SS2	Poznań							289292	240246	204204	254254	171173
SS3	Poznań							283289	240252	192202	252254	171171
SS4	Poznań							289289	240246	192204	254254	171171
SS5	Poznań							289289	242246	190216	252254	171173
SS6	Poznań							289289	246252	198218	258258	171171
SS7	Poznań							289289	246246	192204	254258	171173
SS8	Poznań							292292	246246	198198	254254	171173
SS9	Poznań							289289	240250	204204	258258	171171
SS10	Poznań							283289	250250	204204	254258	171173
SS11	Poznań							289289	246246	198198	254258	171171
SS12	Poznań							289289	246246	198204	252258	171173
SS13	Poznań							289289	246246	204204	252254	171171
SS14	Poznań							283289	246246	190190	254258	171171
SS15	Poznań							289289	246250	190204	252254	171171
SS16	Poznań							289289	246250	188190	254258	171171
SS17	Poznań							289292	246250	192218	254254	173173
SS18	Poznań							289289	250250	188204	254258	171171
SS19	Poznań							289292	242252	204218	254254	173173
SS20	Poznań							289289	246246	192204	254254	171171
1018		1005	996	1004	1018	1018	1018
	LEGEND
	LBS or	original number of leg bearing segments
	LBS tr	number of leg bearing segments transformed into female equivalent
	sex	1: male; 2:female
	TA	trunk anomalies (0: no; 1: yes)
	AA	appendage anomalies (0: no; 1: yes)
	TAS	trunk anomaly score (0-3)
