# Supplementary material for: Population Genetic Structure of a Centipede Species with High Levels of Developmental Instability
Source: PLOS journal article supplement (doi:10.1371/journal.pone.0126245), 2015-06-01

## Supporting information

### Population genetic structure of a centipede species with high levels of developmental instability

Fusco G., Leśniewska M., Congiu L. and Bertorelle G.

**Figure S1.** Bar plot representing the genetic composition of single individuals (thin vertical columns) as inferred from STRUCTURE with  $K=2$ . We applied the LOCPRIOR with admixture model, and the assumption of correlated allele frequencies among populations. The burn-in period was set to 50000, and the run consisted of  $10^7$  iterations.

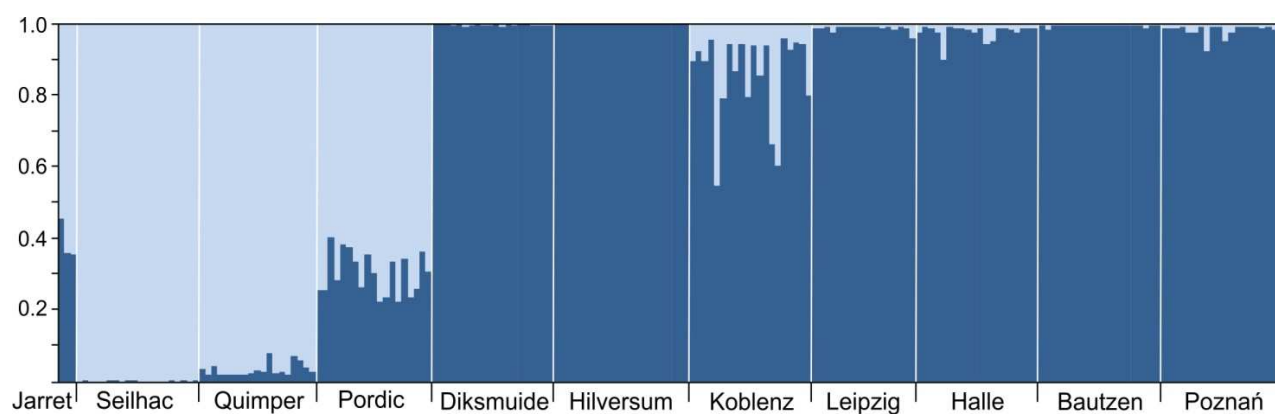

Supplement: S2 (10.1371/journal.pone.0126245.s002) [file journal.pone.0126245.s002]
